# Supplementary material for: Synthesis of hierarchical TiO2 nanoflower with anatase–rutile heterojunction as Ag support for efficient visible-light photocatalytic activity
Source: Royal Society of Chemistry journal article supplement (doi:10.1039/c3dt51293b), 2013-01-01
Supplement: c3dt51293b.pdf [file c3dt51293b.pdf]

## Electronic Supplementary Information

### **Synthesis of hierarchical TiO<sub>2</sub> nanoflower with anatase-rutile heterojunction as Ag support for efficient visible-light photocatalytic activity**

Juan Zhou,<sup>a</sup> Guohui Tian,<sup>\*a,b</sup> Yajie Chen,<sup>a</sup> Jian-Qiang Wang,<sup>c</sup> Xinrui Cao,<sup>a</sup> Yunhan Shi,<sup>a</sup> Kai Pan,<sup>a</sup> and Honggang Fu<sup>\*a</sup>

<sup>a</sup> *Key Laboratory of Functional Inorganic Material Chemistry, Ministry of Education of the People's Republic of China, Heilongjiang University, Harbin 150080 P. R. China*

<sup>b</sup> *Key Laboratory of Chemical Engineering Process & Technology for High-efficiency Conversion, College of Heilongjiang Province, School of Chemistry and Materials Science, Heilongjiang University, Harbin 150080, China.*

<sup>c</sup> *Shanghai Synchrotron Radiation Facility (SSRF), Shanghai Institute of Applied Physics, Chinese Academy of Sciences, Shanghai, 201204, P. R. China.*

*\*Corresponding author E-mail: tiangh@hlju.edu.cn; fuhg@vip.sina.com, Tel.: +86 451 8660 4330, Fax: +86 451 8667 3647*

**Table S1.** Physicochemical properties of obtained different TiO<sub>2</sub> samples.

| Samples          | Anatase<br>(%) | Rutile<br>(%) | S <sub>BET</sub><br>(m <sup>2</sup> /g) | Pore volume<br>(cm <sup>3</sup> /g) | Pore size<br>(nm) | Crystallite<br>size (nm) | Optical<br>cutoff (nm) | Band gap<br>(eV) |
|------------------|----------------|---------------|-----------------------------------------|-------------------------------------|-------------------|--------------------------|------------------------|------------------|
| S-P-1            | 0              | 100           | 89                                      | 0.04                                | 1.9               | 7.2±1                    | 439.7                  | 2.82             |
| S-P-1a           | 20.6           | 79.4          | /                                       | /                                   | /                 | 6.4±0.5                  | /                      | /                |
| S-P-2<br>(S-T-4) | 68.5           | 31.5          | 141                                     | 0.05,0.04                           | 4.5,15.2          | 7.5±0.5                  | 417.5                  | 2.97             |
| S-P-3            | 88.1           | 11.9          | 135                                     | 0.05                                | 2                 | 5.8±0.5                  | 405.2                  | 3.06             |
| S-P-4            | 100            | 0             | 159                                     | 0.06                                | 3.9               | 6.7±1                    | 392.4                  | 3.16             |
| S-T-1            | /              | /             | 156                                     | 0.05                                | 1.4               | /                        | /                      | /                |
| S-T-2            | 100            | 0             | 95                                      | 0.03                                | 0.5               | 10.5±0.5                 | /                      | /                |
| S-T-3            | 91.8           | 8.2           | 103                                     | 0.03,0.02                           | 1.8,9.3           | 6.8±0.5                  | /                      | /                |
| S-T-5            | 42.3           | 57.7          | 135                                     | 0.04                                | 5.6               | 6.0±1                    | /                      | /                |
| S-T-6            | 0              | 100           | 131                                     | 0.04                                | 3.6               | 6.9±0.5                  | /                      | /                |

**Table S2.** Ag content and the crystallite size in the Ag/TiO<sub>2</sub> composites

| Samples             | molar ratios of Ag (%) | Crystallite size (nm) |
|---------------------|------------------------|-----------------------|
| Ag/S-P-1            | 9.53                   | 7.5±0.5               |
| Ag/S-P-2/(Ag/S-T-4) | 9.56                   | 7.8±0.5               |
| Ag/S-P-3            | 9.50                   | 6.1±0.5               |
| Ag/S-P-4            | 9.49                   | 7.0±1                 |
| Ag/P25              | 9.51                   | 20±1                  |
| Ag/S-T-1            | 9.49                   | /                     |
| Ag/S-T-2            | 9.51                   | 11.0±0.5              |
| Ag/S-T-3            | 9.53                   | 7.0±0.5               |
| Ag/S-T-5            | 9.52                   | 6.1±1                 |
| Ag/S-T-6            | 9.54                   | 7.2±1                 |

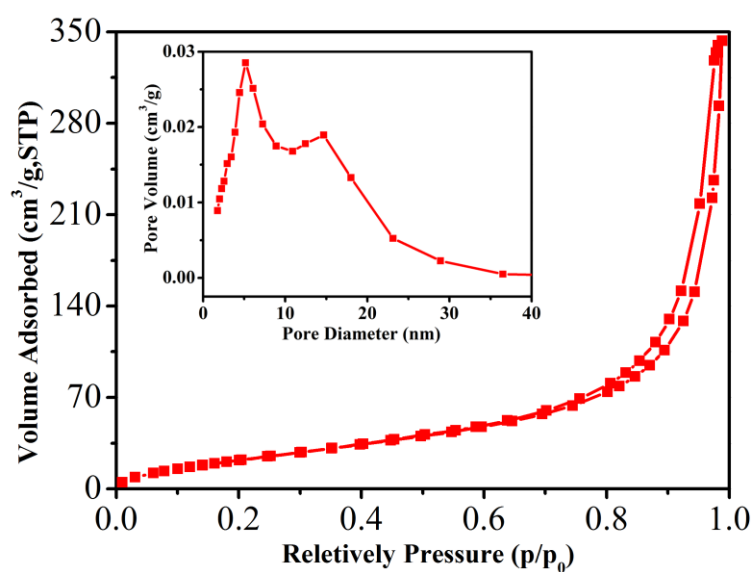

**Fig. S1.** N<sub>2</sub> adsorption–desorption isotherm curves and pore size distribution (inset) of S-T-4 sample.

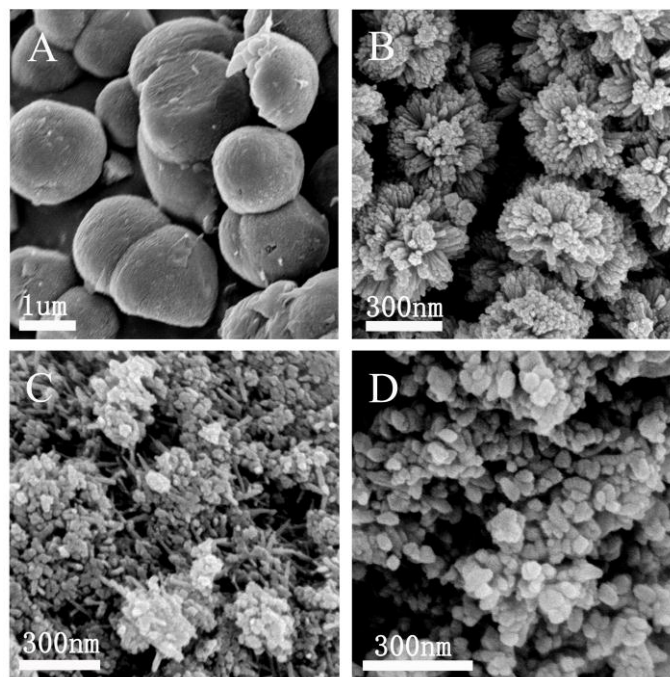

**Fig. S2.** SEM images of the products prepared from hydrothermal for 10 h at different pH values: (A) 0.35, (B) 0.97, (C) 2.10, (D) 3.15.

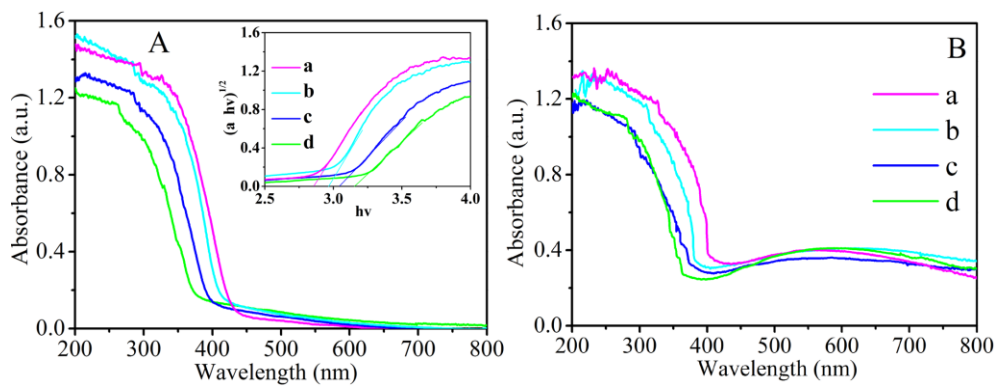

**Fig. S3.** UV-vis diffuse reflectance spectra (A) and plots of the corresponding  $(\alpha h\nu)^{1/2}$  versus  $(h\nu)$  (insert) of the as-synthesized materials prepared from different pH values: (a) S-P-1, (b) S-P-2, (c) S-P-3, (d) S-P-4; the corresponding UV-vis diffuse reflectance spectra (B) of Ag/TiO<sub>2</sub> samples: (a) Ag/S-P-1, (b) Ag/S-P-2, (c) Ag/S-P-3, (d) Ag/S-P-4.

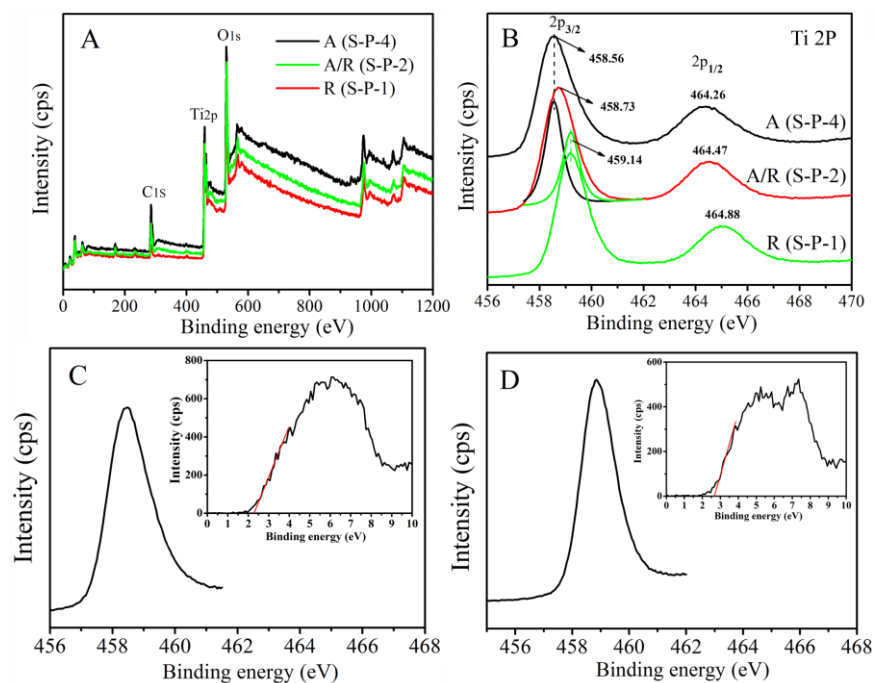

**Fig. S4.** XPS patterns of the prepared  $\text{TiO}_2$  samples (A) XPS survey spectrum; (B)  $\text{Ti}_{2p}$  region of different samples; (C) Core level  $\text{Ti}_{2p_{3/2}}$  spectra and VB spectra for the bulk anatase sample (S-P-4); (D) Core level  $\text{Ti}_{2p_{3/2}}$  spectra and VB spectra for the bulk rutile sample (S-P-1).

**Table S3** XPS Binding energies of the core levels and VBM of anatase, rutile, and anatase-rutile photocatalysts.

| photocatalyst          | state                            | binding energy (eV) |
|------------------------|----------------------------------|---------------------|
| anatase (S-P-4)        | $\text{Ti}_{2p_{3/2}}$           | $458.56 \pm 0.05$   |
|                        | VBM                              | $2.60 \pm 0.05$     |
| rutile (S-P-1)         | $\text{Ti}_{2p_{3/2}}$           | $459.14 \pm 0.05$   |
|                        | VBM                              | $2.48 \pm 0.05$     |
| anatase-rutile (S-P-2) | $\text{Ti}_{2p_{3/2}}$ (anatase) | $458.56 \pm 0.05$   |
|                        | $\text{Ti}_{2p_{3/2}}$ (rutile)  | $459.14 \pm 0.05$   |

The energy difference of the  $\text{Ti}_{2p_{3/2}}$  (rutile) CL peak to VBM,  $(E_{\text{Ti}2p} - E_{\text{V,R}})_{\text{bulk}}^{\text{R}}$ , was determined to be  $459.14 \pm 0.05$  eV, while that of anatase,  $(E_{\text{Ti}2p} - E_{\text{V,A}})_{\text{bulk}}^{\text{A}}$ , was  $458.56 \pm 0.05$  eV.

The energy difference of anatase and rutile CLs,  $\Delta E_{CL}$ , in the anatase-rutile heterostructure was evaluated to be  $0.58 \pm 0.05$  eV. According to equation (1), the resulting VB offset (VBO),  $\Delta E_V$ , was calculated to be 0.12 eV. Finally the CB offset (CBO) was estimated by the formula  $\Delta E_C = \Delta E_V + E_g(\text{anatase}) - E_g(\text{rutile})$ , where  $E_g(\text{anatase})$  and  $E_g(\text{rutile})$  are the optical band gap of anatase and rutile, respectively. Using the band gap of anatase (3.16 eV) and rutile (2.82 eV) determined by UV-visible diffuse reflectance spectroscopy (Table S1), the  $\Delta E_C$  was calculated to be  $0.22 \pm 0.05$  eV that led to the proposed energy band diagram for the anatase-rutile sample shown in Fig. S5.

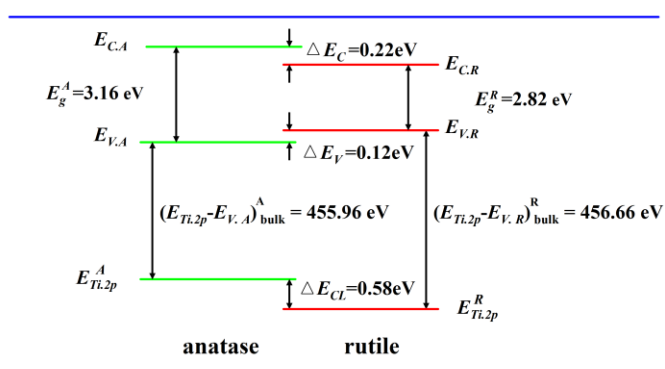

**Fig. S5.** Band alignment diagram of the anatase-rutile heterostructure (S-P-2).

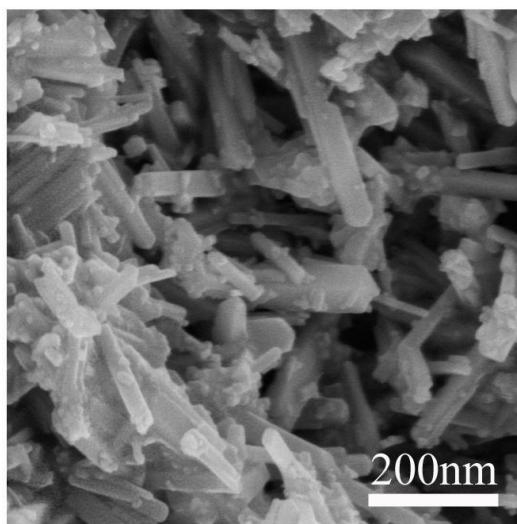

**Fig. S6.** SEM image of the  $\text{TiO}_2$  sample prepared from hydrothermal reaction in the absence of PSS (10 h with  $\text{pH}=0.97$ ).

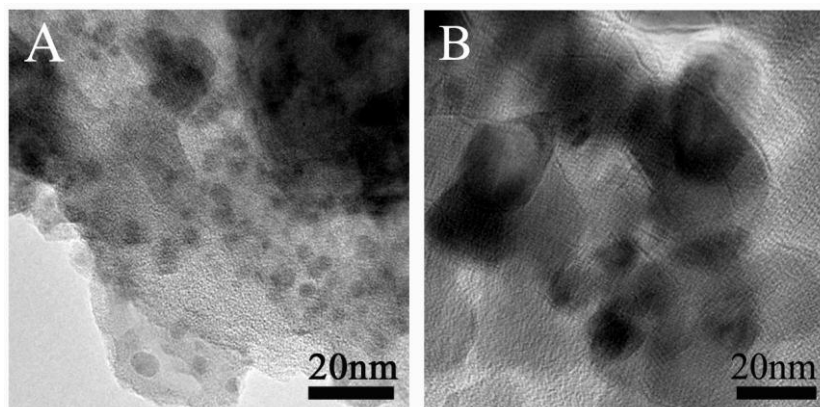

**Fig. S7.** TEM image of (A) Ag/hierarchical flower-like TiO<sub>2</sub> and (B) Ag/Degussa P25.

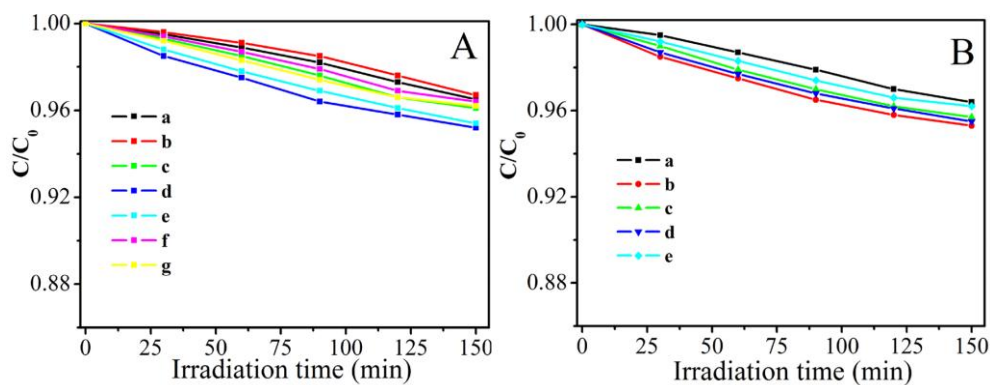

**Fig. S8.** Photocatalytic degradation of phenol under visible-light irradiation by different photocatalysts. A: (a) S-T-1, (b) S-T-2, (c) S-T-3, (d) S-T-4, (e) S-T-5 (f) S-T-6 and (g) Degussa P25. B: (a) S-P-1, (b) S-P-2, (c) S-P-3, (d) S-P-4 and (e) Degussa P25.

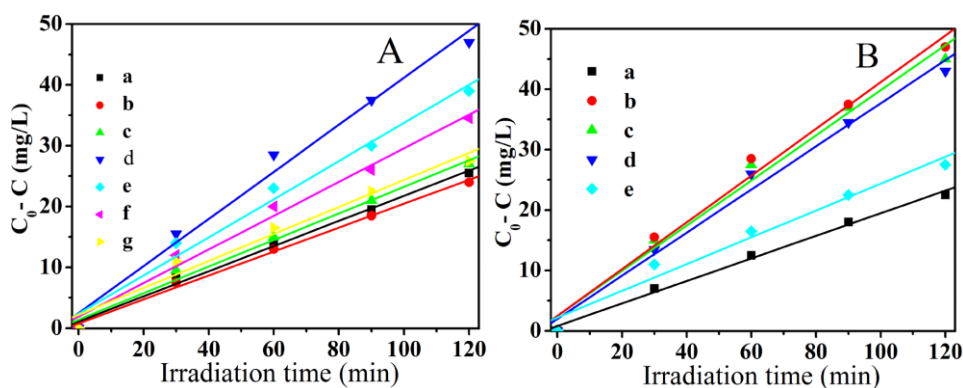

**Fig. S9.** Zero order kinetics of phenol degradation (50 mg/L) under UV light irradiation by different photocatalysts: A: (a) S-T-1, (b) S-T-2, (c) S-T-3, (d) S-T-4, (e) S-T-5 (f) S-T-6 and (g) Degussa P25. B: (a) S-P-1, (b) S-P-2, (c) S-P-3, (d) S-P-4 and (e) Degussa P25.

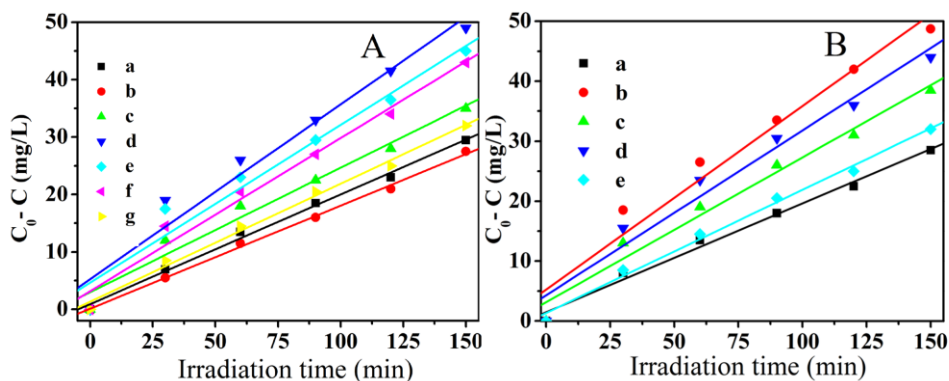

**Fig. S10.** Zero order kinetics of phenol degradation (50mg/L) under visible light irradiation by different photocatalysts: A: (a) Ag/S-T-1, (b) Ag/S-T-2, (c) Ag/S-T-3, (d) Ag/S-T-4, (e) Ag/S-T-5, (f) Ag/S-T-6, and (g) Ag/Degussa P25; B: (a) Ag/S-P-1, (b) Ag/S-P-2, (c) Ag/S-P-3, (d) Ag/S-P-4 and (e) Ag/Degussa P25.

**Table S4.** Apparent ( $k_r$ ) and normalized ( $k_{norm}$ ) rate constants for the degradation of phenol with the as-synthesized samples.

| photocatalysts | $k_r$<br>(g/L min)    | $k_{norm}$<br>(g <sup>2</sup> /m <sup>2</sup> min L) | photocatalysts | $k_r$<br>(g/L min)    | $k_{norm}$<br>(g <sup>2</sup> /m <sup>2</sup> min L) |
|----------------|-----------------------|------------------------------------------------------|----------------|-----------------------|------------------------------------------------------|
| S-T-1          | $2.22 \times 10^{-4}$ | $1.42 \times 10^{-6}$                                | Ag/S-T-1       | $2.00 \times 10^{-4}$ | $1.28 \times 10^{-6}$                                |
| S-T-2          | $2.08 \times 10^{-4}$ | $2.19 \times 10^{-6}$                                | Ag/S-T-2       | $1.80 \times 10^{-4}$ | $1.89 \times 10^{-6}$                                |
| S-T-3          | $2.38 \times 10^{-4}$ | $2.31 \times 10^{-6}$                                | Ag/S-T-3       | $2.48 \times 10^{-4}$ | $2.41 \times 10^{-6}$                                |
| S-T-4          | $4.18 \times 10^{-4}$ | $2.96 \times 10^{-6}$                                | Ag/S-T-4       | $3.72 \times 10^{-4}$ | $2.64 \times 10^{-6}$                                |
| (S-P-2)        | $3.47 \times 10^{-4}$ | $2.57 \times 10^{-6}$                                | (Ag/S-P-2)     | $3.36 \times 10^{-4}$ | $2.38 \times 10^{-6}$                                |
| S-T-5          | $3.03 \times 10^{-4}$ | $2.31 \times 10^{-6}$                                | Ag/S-T-5       | $3.09 \times 10^{-4}$ | $2.36 \times 10^{-6}$                                |
| S-T-6          | $1.99 \times 10^{-4}$ | $2.24 \times 10^{-6}$                                | Ag/S-T-6       | $1.96 \times 10^{-4}$ | $2.20 \times 10^{-6}$                                |
| S-P-1          | $4.05 \times 10^{-4}$ | $3.00 \times 10^{-6}$                                | Ag/S-P-1       | $2.76 \times 10^{-4}$ | $2.04 \times 10^{-6}$                                |
| S-P-3          | $3.88 \times 10^{-4}$ | $2.44 \times 10^{-6}$                                | Ag/S-P-3       | $3.13 \times 10^{-4}$ | $1.96 \times 10^{-6}$                                |
| S-P-4          | $2.52 \times 10^{-4}$ | $5.25 \times 10^{-6}$                                | Ag/S-P-4       | $2.20 \times 10^{-4}$ | $4.58 \times 10^{-6}$                                |
| Degussa P25    |                       |                                                      | Ag/DegussaP25  |                       |                                                      |



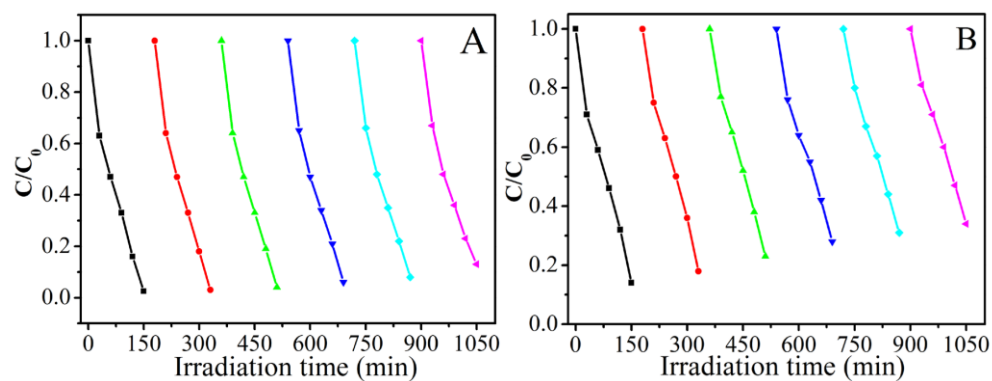

**Fig. S11.** Cycling runs in the photodegradation of phenol in the presence of (A) Ag/hierarchical flower-like  $TiO_2$  and (B) Ag/Degussa P25 under visible light irradiation.

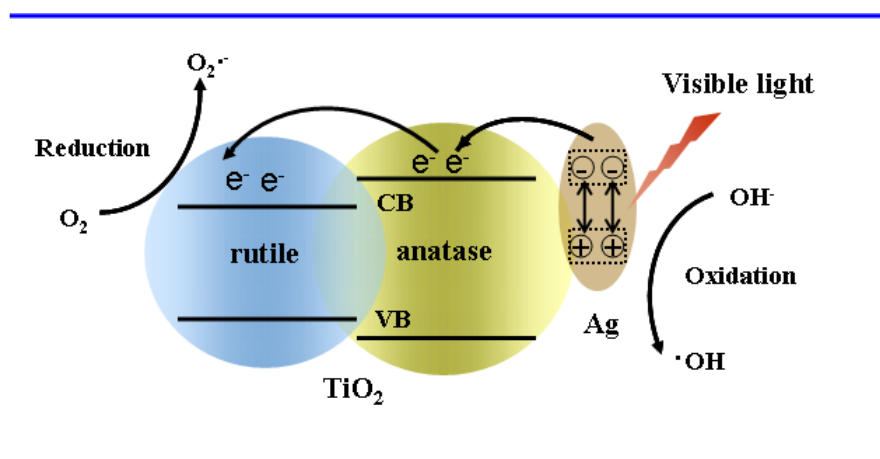

**Fig. S12.** Proposed mechanism for the photocatalytic degradation of phenol by the sample of Ag/S-T-4 nanocomposites under visible light irradiation.
